# Supplementary material for: Prevalence of Venous Thromboembolism in Intensive Care Units: A Meta-Analysis
Source: MDPI journal article supplement (doi:10.3390/jcm11226691), 2022-11-11
Supplement: s1 [file s1]

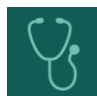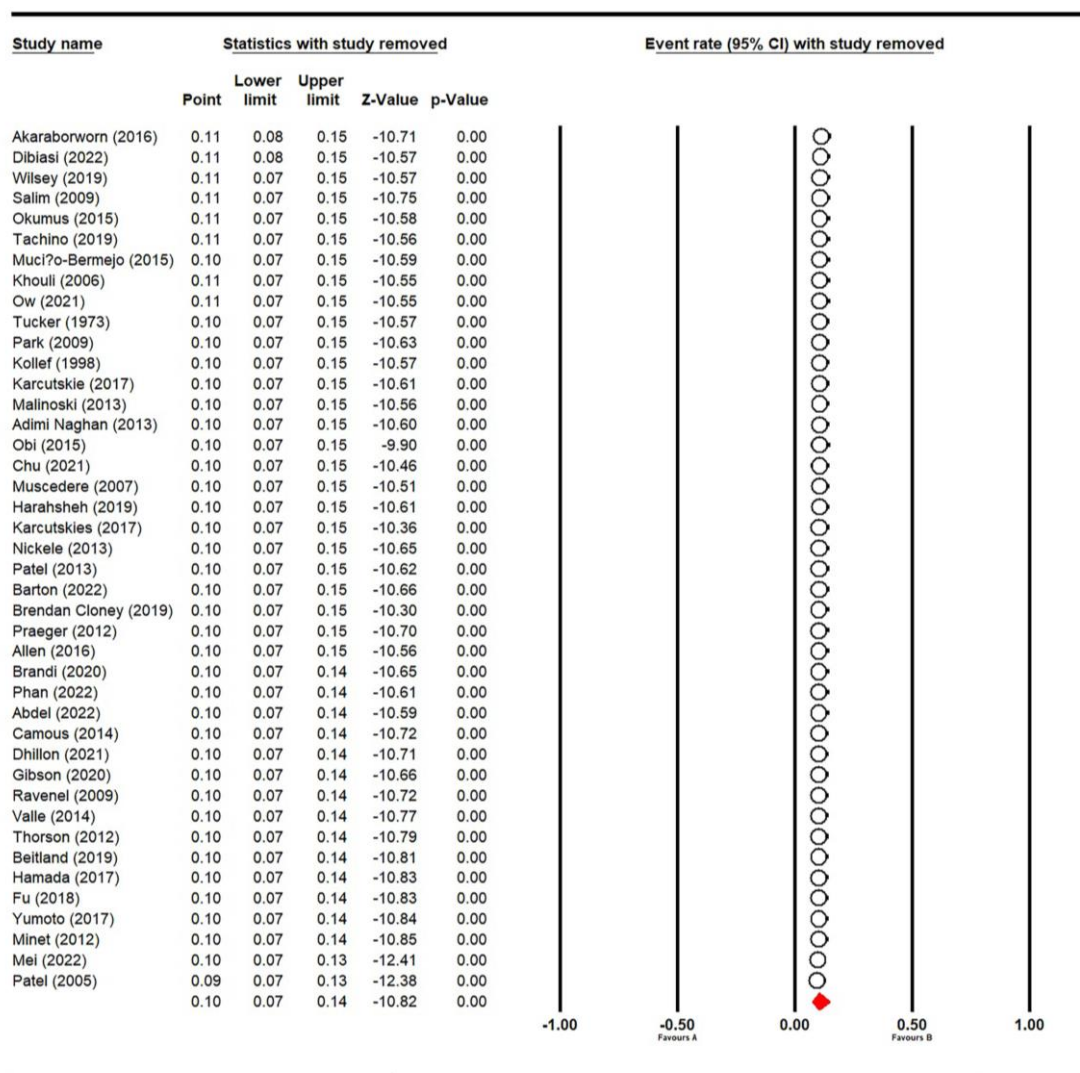

**Figure S1.** Sensitive analysis on prevalence of VTE in intensive care patients [5,6,25–64]. The red symbol indicated the prevalence of VTE in ICU patients.

**Table S1.** Metaregression analyses of prevalence of VTE in intensive care patients.

| Continuous variable | B Value (Point Estimate) | Z Value | p Value     |
|---------------------|--------------------------|---------|-------------|
| Age                 | 0.04455                  | 11.99   | $p < 0.001$ |
| Study quality       | −0.09251                 | −3.36   | $p < 0.001$ |
| Sample size         | −0.00030                 | −22.41  | $p < 0.001$ |
| Malignancy          | −0.01705                 | −8.23   | $p < 0.001$ |
| Sex                 | −0.00984                 | −4.08   | $p < 0.001$ |
| Spinal cord injury  | 0.07058                  | 7.45    | $p < 0.001$ |
| ISS                 | 0.16487                  | 12.99   | $p < 0.001$ |
